# Supplementary material for: Rosmarinic Acid as a Potential GSK3β Inhibitor for Autism Spectrum Disorder: Insights from Integrative In-Silico Study
Source: Research Square preprint supplement (doi:10.21203/rs.3.rs-7284294/v1), 2025-08-18
Supplement: Supplementary file 1 [file 71a42d425130bff10ea8a0f6.docx]

**Rosmarinic Acid as a Potential GSK3β Inhibitor for Autism Spectrum Disorder: Insights from an Integrative In-Silico Study**

Priya Joon1†, Deepak Deepak2,*,† and Anil Kumar1,*

1Pharmacology Division, University Institute of Pharmaceutical Sciences, Panjab University, Chandigarh, 110014, India.

2Faculty of Chemistry and Pharmacy, Ludwig-Maximilians-Universitat Munchen, Munich, 81377, Germany.

***Corresponding authors:** [deepmalik828@gmail.com](mailto:deepmalik828@gmail.com); [kumaruips@yahoo.com](mailto:kumaruips@yahoo.com)

**Contributing authors:** [piks.priya@gmail.com](mailto:piks.priya@gmail.com); [deepmalik828@gmail.com](mailto:deepmalik828@gmail.com)

†These authors contributed equally to this work.

**Supplementary Data**

**
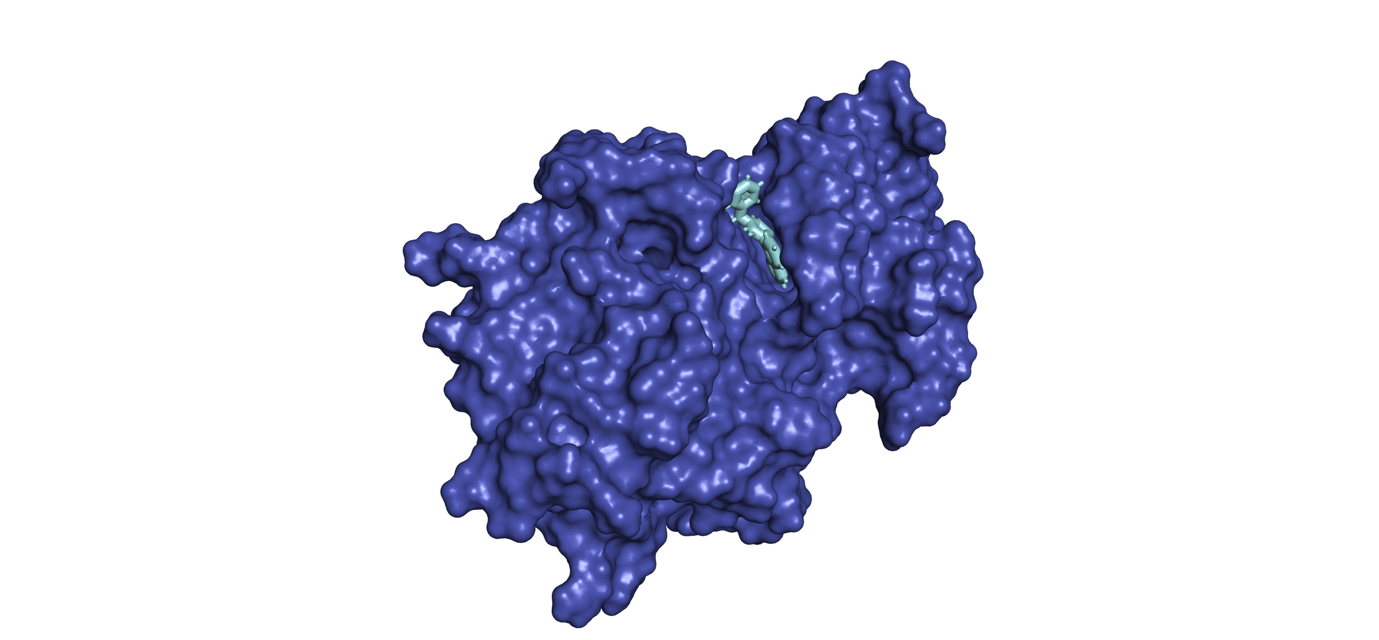
**

Fig. S 1 Interaction of Tidesglusib within the GSK3β Binding Site. GSK3β (surface representation in blue) with docked Tidesglusib (stick representation in cyan).

**
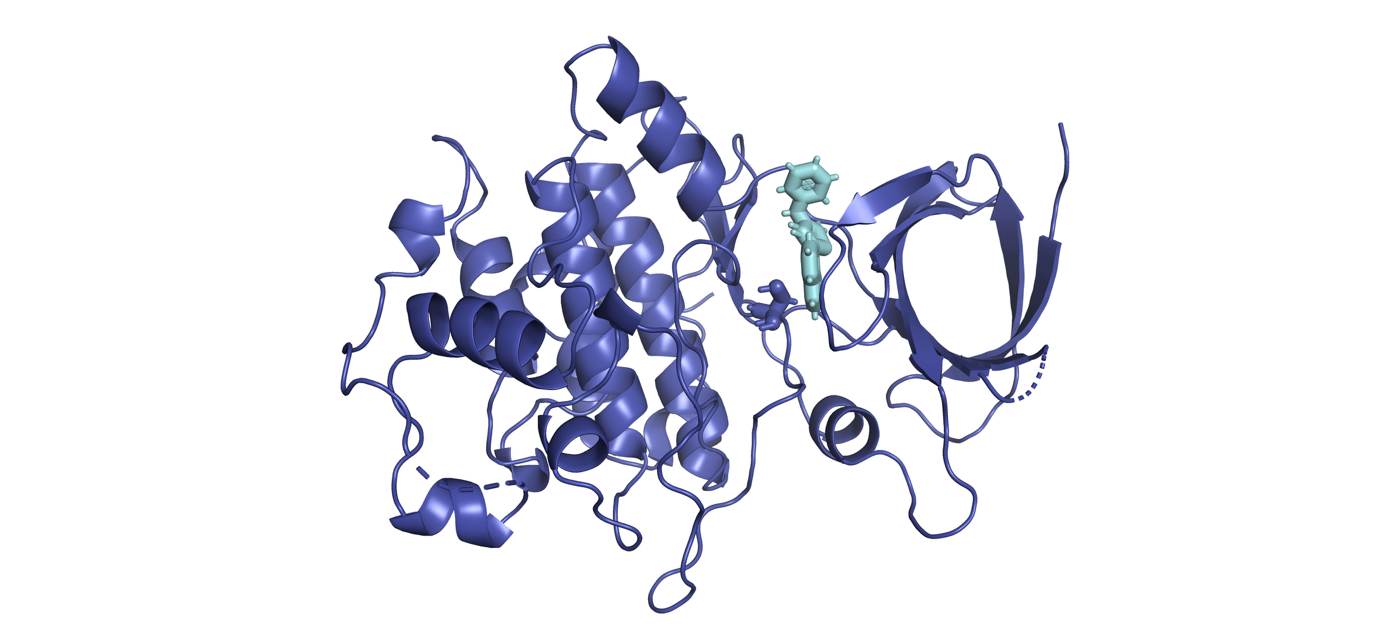
**

Fig. S 2 Interaction of Tidesglusib within the GSK3β Binding Site. GSK3β (ribbon representation in blue) with docked Tidesglusib (stick representation in cyan).


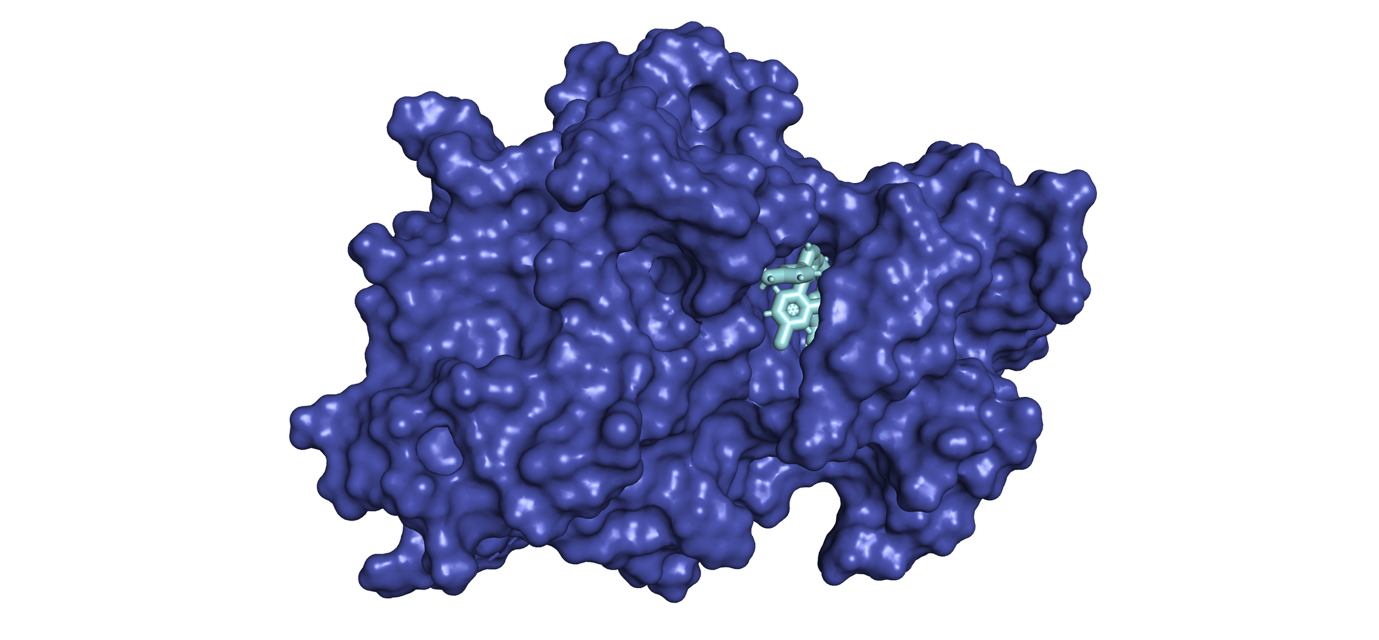


Fig. S 3 Interaction of Laduviglusib within the GSK3β Binding Site. GSK3β (surface representation in blue) with docked Laduviglusib (stick representation in cyan).


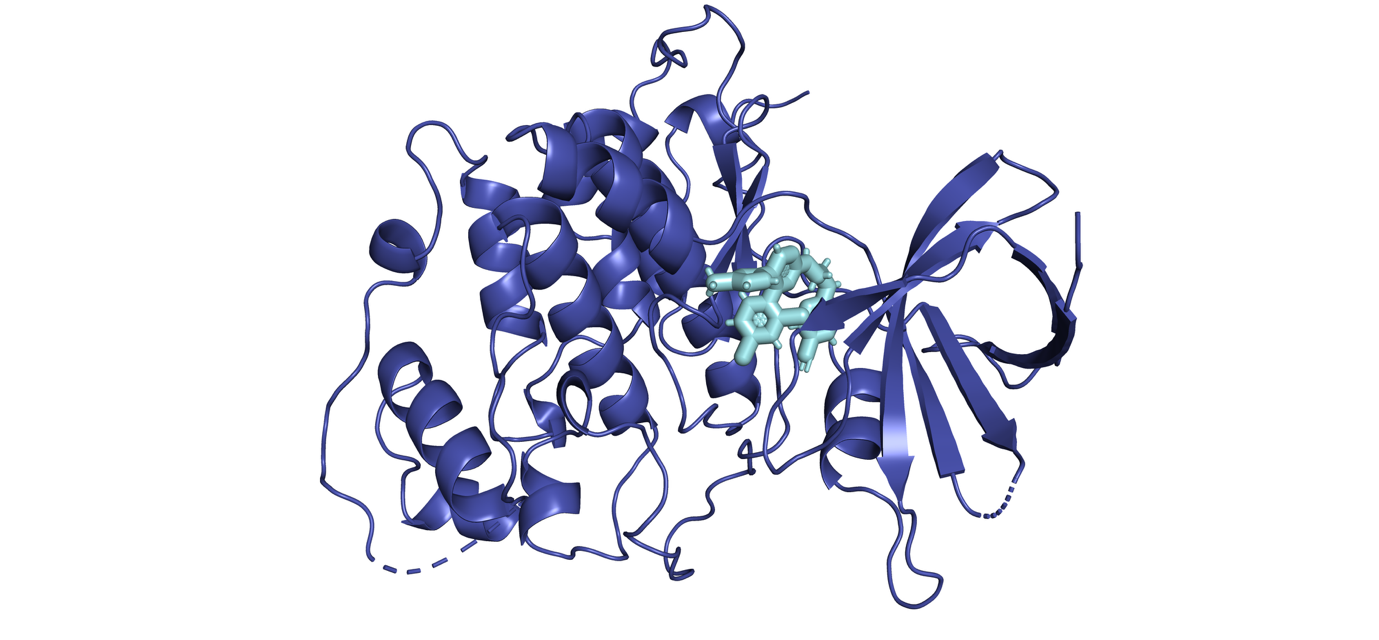


Fig. S 4 Interaction of Laduviglusib within the GSK3β Binding Site. GSK3β (ribbon representation in blue) with docked Laduviglusib (stick representation in cyan).


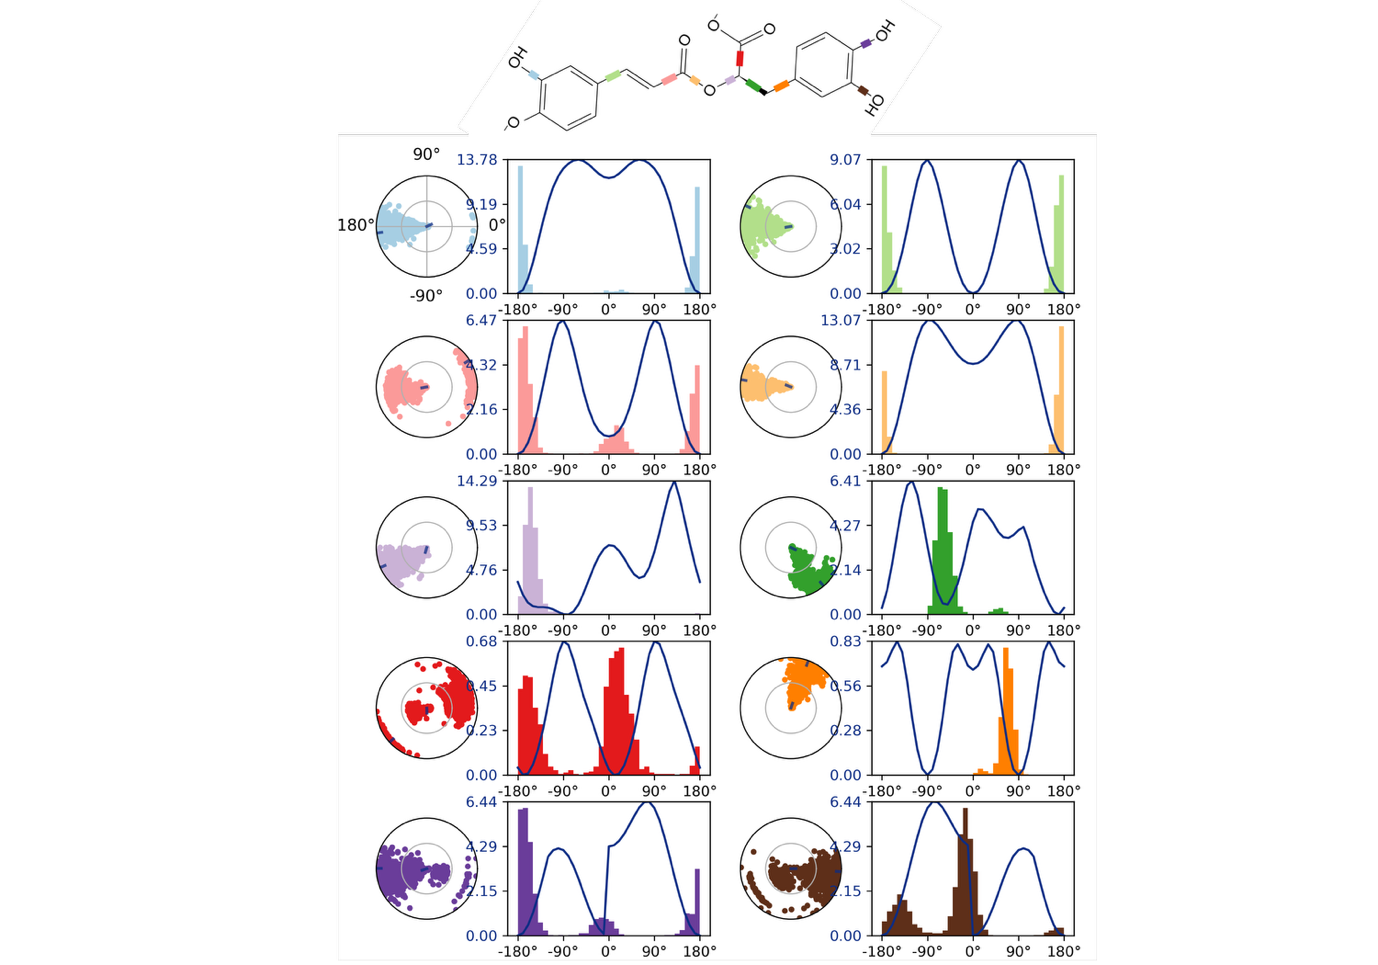


Fig. S 5 Torsional analysis of Rosmarinic acid in complex with GSK3β. The top panel shows the chemical structure of Rosmarinic acid with color-coded bonds corresponding to the analyzed torsions. For each rotatable bond, the left polar plot depicts the sampled dihedral angle distributions during molecular dynamics simulations, while the adjacent right plot displays the corresponding torsional potential energy profiles. The six most relevant torsional angles are presented, highlighting areas of conformational flexibility and preferred energetically favorable states, as sampled over the simulation trajectory. These analyses provide insights into the conformational landscape and stability of Rosmarinic acid when bound to the GSK3β active site.
